# Supplementary material for: Constrained subsystem density functional theory
Source: Royal Society of Chemistry journal article supplement (doi:10.1039/c6cp00528d), 2016-01-01
Supplement: c6cp00528d1.pdf [file c6cp00528d1.pdf]

# Supplementary information for: Constrained Subsystem Density Functional Theory

Pablo Ramos<sup>1</sup> and Michele Pavanello<sup>2</sup>

Department of Chemistry, Rutgers University, Newark, NJ 07102-1811, USA

## 1 Diabatic States generated on DNA

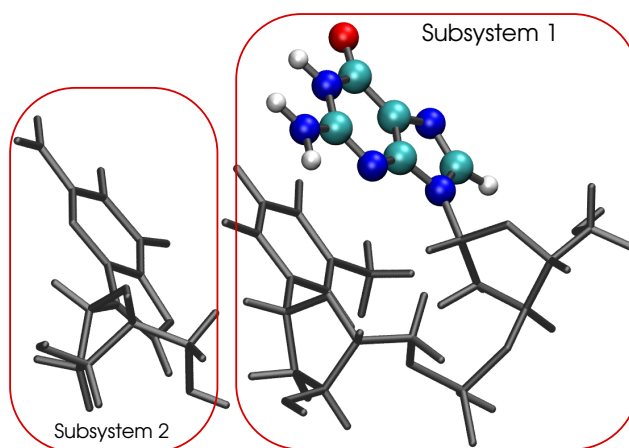

Figure S1: Diabatic state  $G_1$ , C atoms in cyan, N atoms in blue, O atoms in red and H atoms in white. In black the non-constrained atoms.

---

<sup>1</sup>E-mail: prr34@rutgers.edu

<sup>2</sup>E-mail: m.pavanello@rutgers.edu

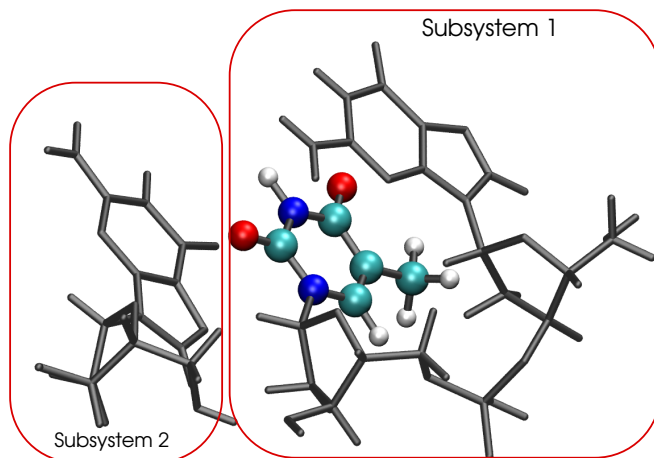

Figure S2: Diabatic state T, C atoms in cyan, N atoms in blue, O atoms in red and H atoms in white. In black the non-constrained atoms.

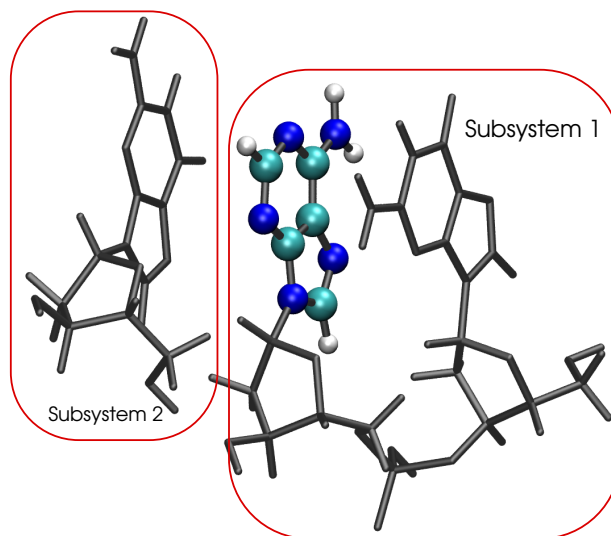

Figure S3: Diabatic state A, C atoms in cyan, N atoms in blue and H atoms in white. In black the non-constrained atoms.

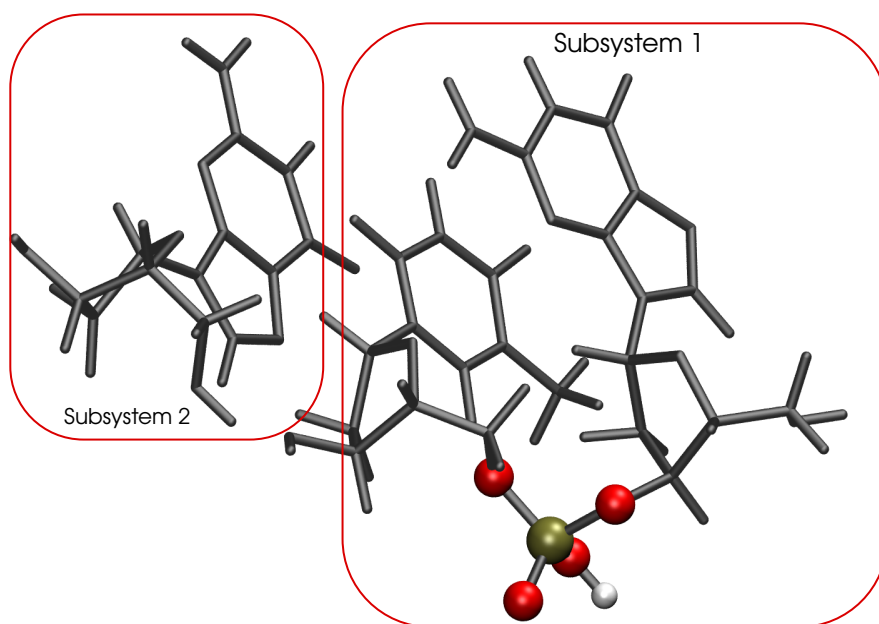

Figure S4: Diabatic state  $\text{PO}_4$ , P atoms in yellow, O atoms in red and H atoms in white. In black the non-constrained atoms.

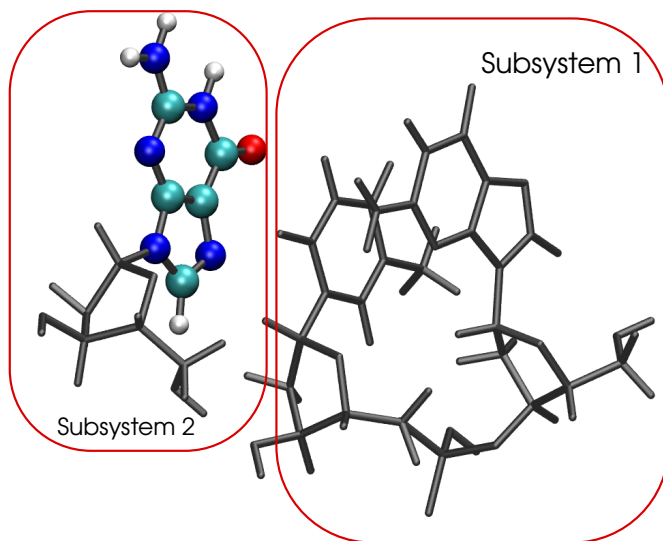

Figure S5: Diabatic state  $G_2$ , C atoms in cyan, N atoms in blue, O atoms in red and H atoms in white. In black the non-constrained atoms.
